# Supplementary material for: Hydrogen assisted synthesis of branched nickel nanostructures: a combined theoretical and experimental study
Source: Royal Society of Chemistry journal article supplement (doi:10.1039/c7cp04673a), 2017-01-01
Supplement: c7cp04673a1.pdf [file c7cp04673a1.pdf]

## **Hydrogen Assisted Synthesis of Branched Nickel Nanostructures: A Combined Theoretical and Experimental Study**

*Xin Liang,<sup>†,‡</sup> Ning Liu,<sup>†,‡,‡</sup> Huiyun Qiu,<sup>†</sup> Chong Zhang,<sup>†</sup> Donghai Mei,<sup>‡,\*</sup> Biahua Chen<sup>†,\*</sup>*

<sup>†</sup>State Key Laboratory of Chemical Resource Engineering, Beijing University of  
Chemical Technology, Beijing, 100029, China

<sup>‡</sup>Institute of Integrated Catalysis, Pacific Northwest National Laboratory, Richland, WA  
99352, USA

<sup>#</sup>These authors contributed equally to this work.

\* Corresponding authors:

[chenbh@mail.buct.edu.cn](mailto:chenbh@mail.buct.edu.cn) (B. Chen); [donghai.mei@pnnl.gov](mailto:donghai.mei@pnnl.gov) (D. Mei)

# Supporting Information

|                                                                                                                                                                                                   |     |
|---------------------------------------------------------------------------------------------------------------------------------------------------------------------------------------------------|-----|
| <b>Chemical Potential Calculation Method of Atomic H</b>                                                                                                                                          | S1  |
| <b>Table S1.</b> Various k-point grids used in bulk and surface slab structure calculations                                                                                                       | S2  |
| <b>Table S2.</b> Adsorption energy ( $\Delta E_{\text{ads}}$ ) and magnetic moments data of atomic H adsorption on Ni(111), Ni(100), and Ni(110)                                                  | S3  |
| <b>Table S3.</b> Chemical potential of atomic H at P = 6 bar and T = 100-1200 K                                                                                                                   | S4  |
| <b>Table S4.</b> Chemical potential of atomic H at P = 14 bar and T = 100-1200 K                                                                                                                  | S4  |
| <b>Table S5.</b> The crystalline size of Ni samples estimated by Debye-Scherrer equation using Ni (111) diffractions                                                                              | S5  |
| <b>Fig. S1</b> Optimized models of (a) oleylamine and (b) ethanol adsorption on Ni(111)-p(4x4)                                                                                                    | S7  |
| <b>Fig. S2</b> Optimized adsorption models of oleylamine and atomic H coadsorption on Ni(111) (a), Ni(100) (b), and Ni(110) (c).                                                                  | S8  |
| <b>Fig. S3</b> Surface free energy of (a) Ni(111), (b) Ni(100), and (c) Ni(111) as a function of temperature for different H coverages (0, 0.25, 0.5, 0.75, 1.0, 1.5, 1.75, 2.0 ML) at P = 14 bar | S9  |
| <b>Fig. S4</b> TEM images of the intermediates of Ni-SB synthesized using different times: (a) 40 min; (b) 1.5 h; (c) 2.5 h                                                                       | S10 |
| <b>Fig. S5</b> TEM images of the intermediates of Ni-MP synthesized using different times: (a) 40 min; (b) 1.5 h; (c) 2.5 h                                                                       | S11 |
| <b>Fig. S6</b> Influencing of the magnetic stirring rate on the morphologies of the Ni-MP: (a) $r=0$ r/min (b) $r=200$ r/min (c) $r=400$ r/min                                                    | S12 |
| <b>Fig. S7</b> EDS spectrum of Ni nanoparticles                                                                                                                                                   | S13 |

**Fig. S8** a) TEM image of the pod of Ni-MP, b) HRTEM image of the pod of Ni-MP, the insert is corresponding FFT transferred pattern S14

**Fig. S9** SAED image of Ni-SB S15

## Chemical Potential Calculation Method of Atomic H

In present work, the chemical potential of atomic H were calculated according the following equation, which was referenced from Res. S1

$$\begin{aligned}\mu_H(T, p^o) &= \mu_H^{H-rich}(0K, p^o) + 1/2\Delta G(T, p^o, H_2) \\ &= 1/2[H(T, p^o, H_2) - H(0K, p^o, H_2)] \\ &\quad - 1/2T[S(T, p^o, H_2) - S(0K, p^o, H_2)]\end{aligned}\quad (1)$$

where H was enthalpy; S was entropy of H<sub>2</sub> molecule at standard pressure p<sup>o</sup> and temperature of T. The thermodynamic data of H<sub>2</sub> were got from JANAF Thermochemical Table.<sup>S2</sup>

Based on the calculated  $\mu_H(T, p^o)$  at standard pressure of 1 atm, it can also further calculated the H chemical potential at and pressure of p, according to the Eq. 2:

$$\mu_H(T, p) = \mu_H(T, p^o) + 1/2kT \ln(p / p^o) \quad (2)$$

where k represent the Boltzmann constant. The calculated chemical potential of atomic H at T = 100-1200 K and P = 6 and 14 bar were listed in Table S1 and Table S2, respectively.

(S1) Reuter, K.; Scheffler, M. Composition, Structure, and Stability of RuO<sub>2</sub>(110) as a function of oxygen pressure. Phys. Rev. B, 65, 035406.

(S2) Stull, D. R.; Prophet, H. JANAF Thermochemical Tables, 2nd ed. (U.S. National Bureau of Standards, Washington, DC, 1971).

**Table S1.** Various  $k$ -point grids used in bulk and surface slab structure calculations.

| Model          | $k$ -point grid |
|----------------|-----------------|
| Ni Bulk        | 10 x 10 x 10    |
| Ni(111)-p(2x2) | 4x4x1           |
| Ni(100)-p(2x2) | 3x4x1           |
| Ni(111)-p(2x2) | 4x4x1           |

**Table S2.** Adsorption energy ( $\Delta E_{\text{ads}}$ ) and magnetic moments data of atomic H adsorption on Ni(111), Ni(100), and Ni(110)

| Ni facet | H site          | H coverage /<br>ML | Adsorption<br>energy( $\Delta E_{\text{ads}}$ ) / eV | Magnetic moment per<br>Nickle / eV |
|----------|-----------------|--------------------|------------------------------------------------------|------------------------------------|
| Ni(111)  | Fcc             | 0.25               | -0.65                                                | 0.56                               |
| Ni(111)  | Fcc             | 0.5                | -1.22                                                | 0.53                               |
| Ni(111)  | Fcc             | 0.75               | -1.80                                                | 0.48                               |
| Ni(111)  | Fcc             | 1                  | -2.37                                                | 0.45                               |
| Ni(111)  | Fcc+Hcp         | 1.5                | -1.58                                                | 0.21                               |
| Ni(100)  | 4F <sup>a</sup> | 0.25               | -0.59                                                | 0.59                               |
| Ni(100)  | 4F <sup>a</sup> | 0.5                | -1.19                                                | 0.56                               |
| Ni(100)  | 4F <sup>a</sup> | 0.75               | -1.79                                                | 0.51                               |
| Ni(100)  | 4F <sup>a</sup> | 1                  | -2.39                                                | 0.48                               |
| Ni(100)  | Br <sup>b</sup> | 1.5                | -1.68                                                | 0.47                               |
| Ni(100)  | Br <sup>b</sup> | 1.75               | -1.61                                                | 0.44                               |
| Ni(100)  | Br <sup>b</sup> | 2.0                | -1.46                                                | 0.49                               |
| Ni(110)  | 3F <sup>c</sup> | 0.25               | -0.46                                                | 0.65                               |
| Ni(110)  | 3F <sup>c</sup> | 0.5                | -0.970                                               | 0.63                               |
| Ni(110)  | 3F <sup>c</sup> | 0.75               | -1.37                                                | 0.64                               |
| Ni(110)  | 3F <sup>c</sup> | 1                  | -1.84                                                | 0.61                               |
| Ni(110)  | SB <sup>d</sup> | 1.5                | -2.67                                                | 0.55                               |
| Ni(110)  | SB <sup>d</sup> | 1.75               | -2.98                                                | 0.50                               |
| Ni(110)  | SB <sup>d</sup> | 2.0                | -3.43                                                | 0.48                               |

<sup>a</sup> four fold site

<sup>b</sup> bridge site

<sup>c</sup> three fold site

<sup>d</sup> short bridge site

**Table S3.** Chemical potential of atomic H at P = 6 bar and T = 100-1200 K

| T / K | $\mu_H(T, p) / \text{eV}$ | T / K | $\mu_H(T, p) / \text{eV}$ |
|-------|---------------------------|-------|---------------------------|
| 100   | -0.03                     | 700   | -0.41                     |
| 200   | -0.08                     | 800   | -0.48                     |
| 300   | -0.14                     | 900   | -0.56                     |
| 400   | -0.2                      | 1000  | -0.63                     |
| 500   | -0.26                     | 1100  | -0.71                     |
| 600   | -0.33                     | 1200  | -0.79                     |

**Table S4.** Chemical potential of atomic H at P = 14 bar and T = 100-1200 K

| T / K | $\mu_H(T, p) / \text{eV}$ | T / K | $\mu_H(T, p) / \text{eV}$ |
|-------|---------------------------|-------|---------------------------|
| 100   | -0.03                     | 700   | -0.38                     |
| 200   | -0.07                     | 800   | -0.45                     |
| 300   | -0.13                     | 900   | -0.52                     |
| 400   | -0.18                     | 1000  | -0.60                     |
| 500   | -0.25                     | 1100  | -0.67                     |
| 600   | -0.31                     | 1200  | -0.75                     |

**Table S5.** The crystalline size of Ni samples estimated by Debye-Scherrer equation using Ni (111) diffractions

| Sample | Crystalline Size <sup>a</sup> (nm) | Relative Crystallinity <sup>b</sup> |
|--------|------------------------------------|-------------------------------------|
| Ni-NP  | 59                                 | 96                                  |
| Ni-SB  | 49                                 | 90                                  |
| Ni-MP  | 60                                 | 93                                  |

<sup>a</sup> measured by Debye-Scherrer equation

<sup>b</sup> with respect to (111) diffraction of standard Ni (PDF #01-0850)

The crystalline size of Ni-MP and Ni-SB were calculated based on Ni (111) diffractions according to Debye-Scherrer equation. The calculation results were listed in table S4.



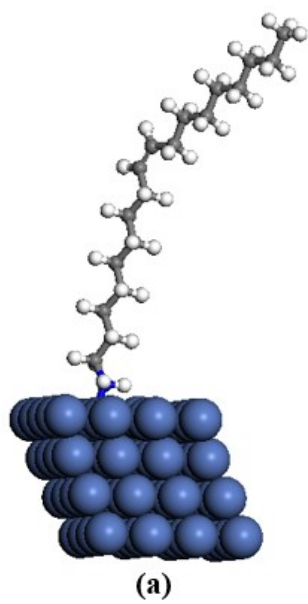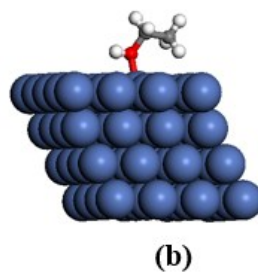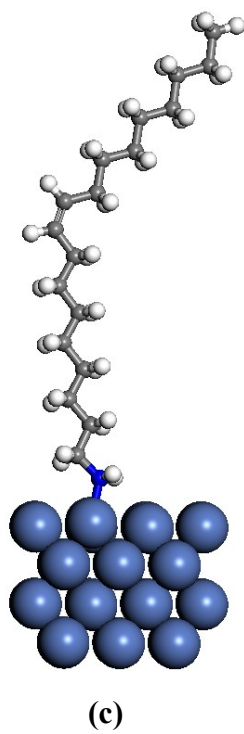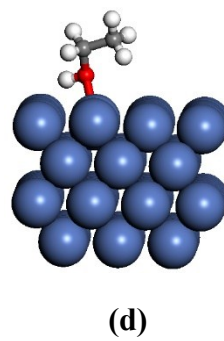

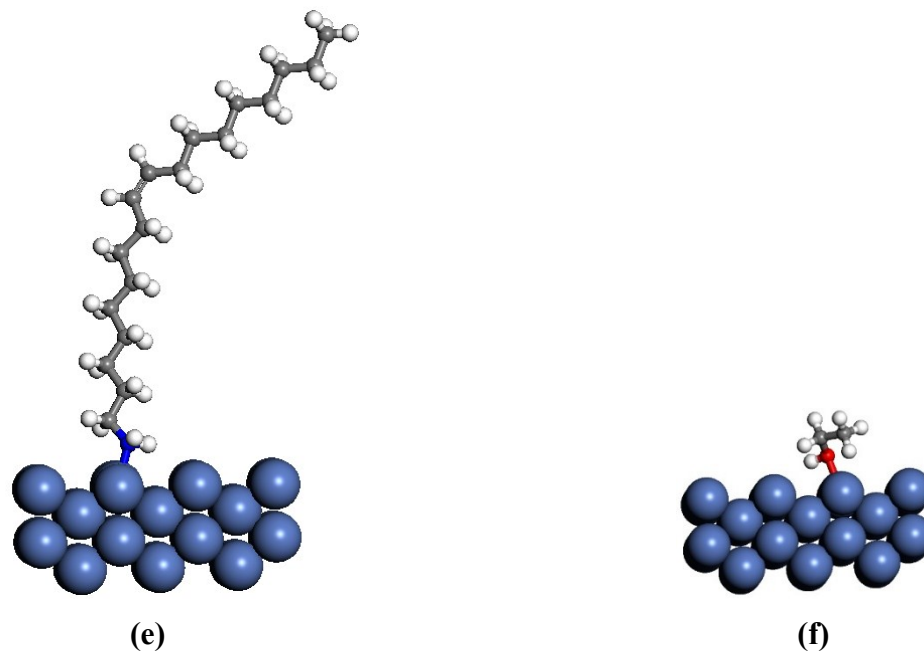

**Fig. S1** Optimized adsorption models of oleylamine and ethanol on Ni(111) (a, b), Ni(100) (c, d), and Ni(110) (e, f).

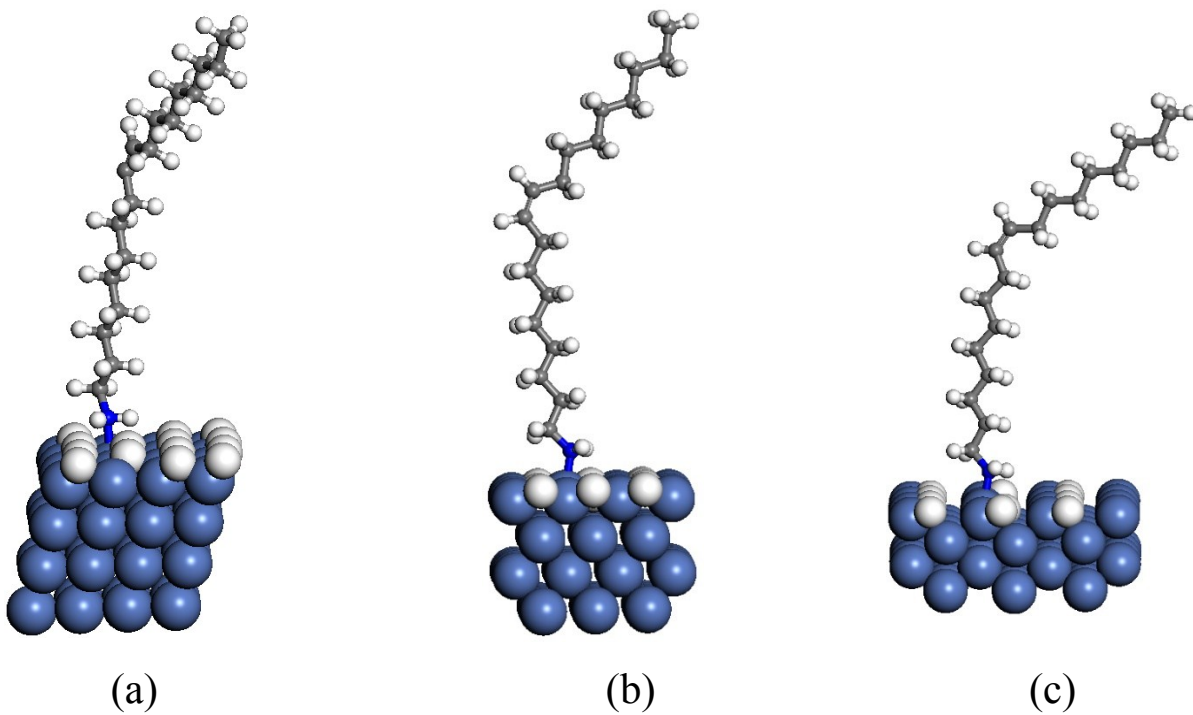

**Fig. S2** Optimized adsorption models of oleylamine and atomic H coadsorption on Ni(111) (a), Ni(100) (b), and Ni(110) (c).

The total adsorption energies was respectively calculated to be -1.02 (Ni111), -0.61 (Ni100), and -0.95 eV (Ni110).

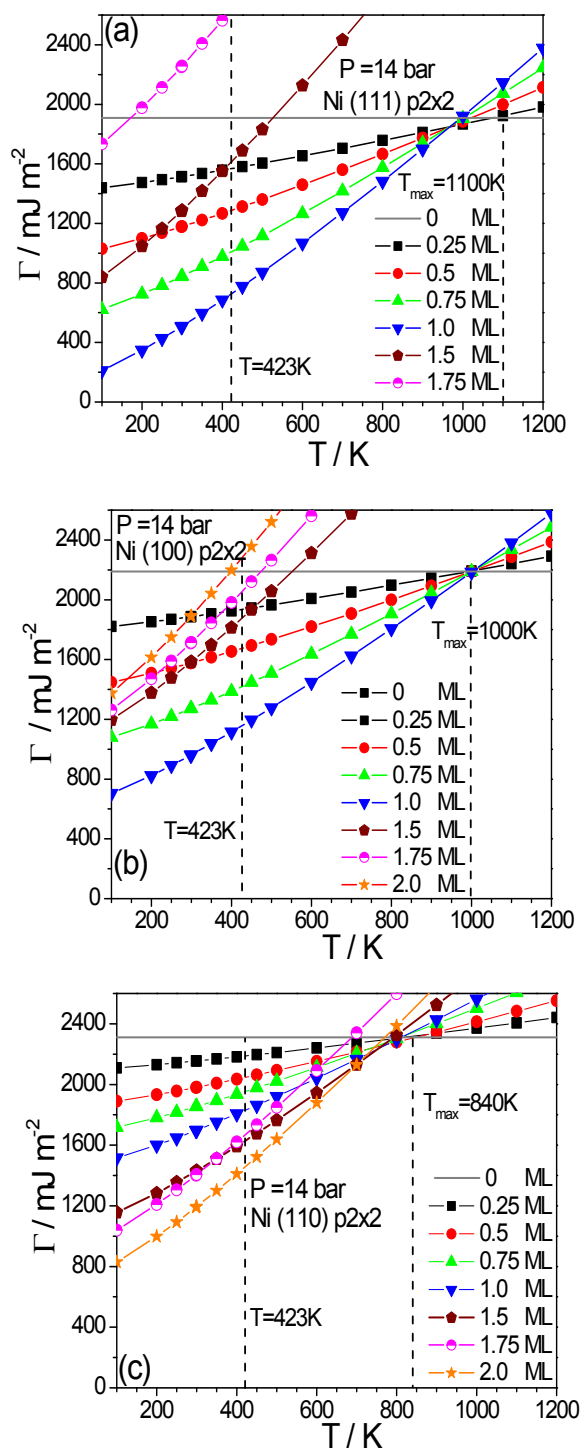

**Fig. S3.** Surface free energy of (a) Ni(111), (b) Ni(100), and (c) Ni(111) as a function of temperature for different H coverages (0, 0.25, 0.5, 0.75, 1.0, 1.5, 1.75, 2.0 ML) at  $P = 14$  bar.

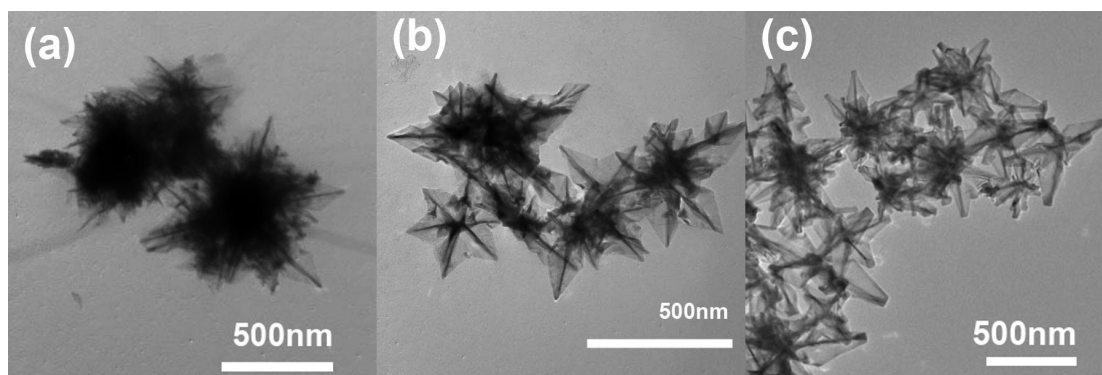

**Fig. S4** TEM images of the intermediates of Ni-SB synthesized using different times: (a) 40 min; (b) 1.5 h; (c) 2.5 h

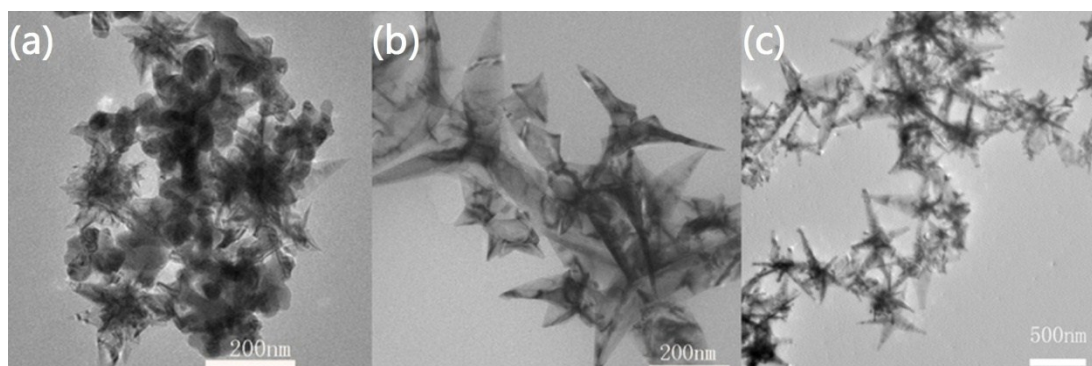

**Fig. S5** TEM images of the intermediates of Ni-MP synthesized using different times: (a) 40 min; (b) 1.5 h; (c) 2.5 h

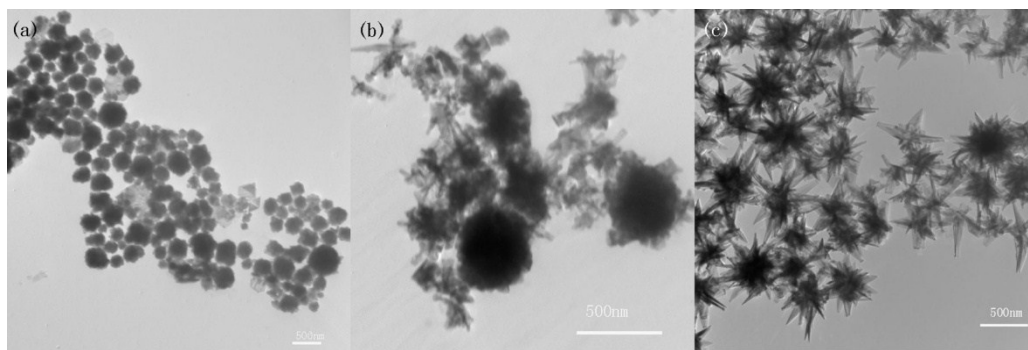

**Fig. S6** Influencing of the magnetic stirring rate on the morphologies of the Ni-MP: (a)  $r=0$  r/min (b)  $r=200$  r/min (c)  $r=400$  r/min

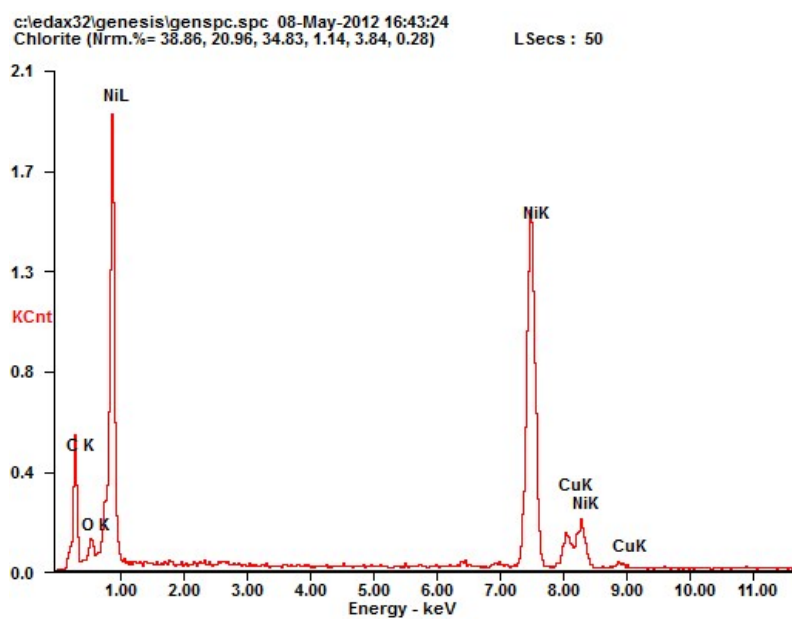

**Fig. S7.** EDS spectrum of Ni nanoparticles.



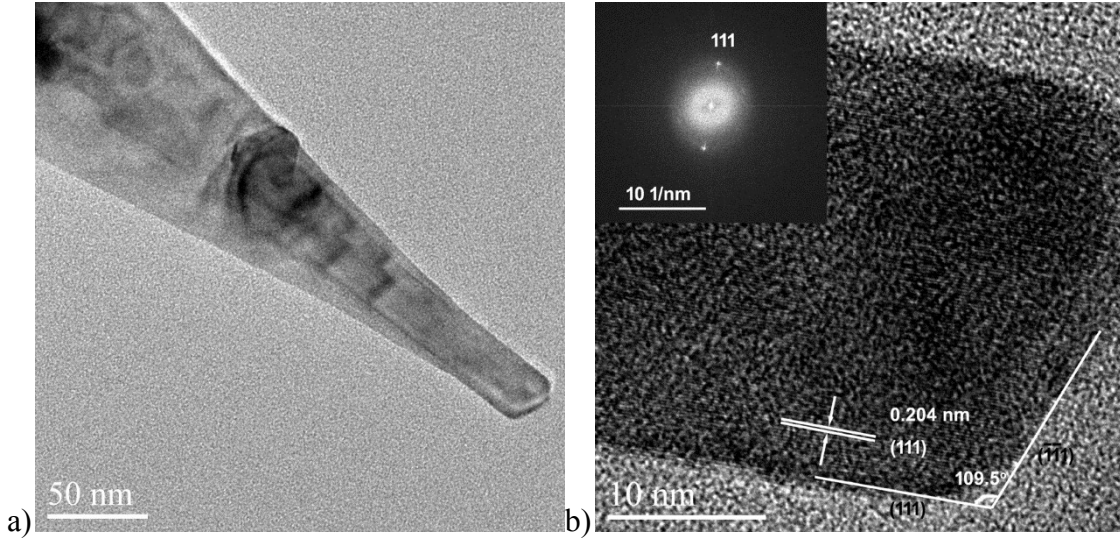

**Fig. S8** a) TEM image of the pod of Ni-MP, b) HRTEM image of the pod of Ni-MP, the insert is corresponding FFT transferred pattern.

Figure S5b shows the crystal fringes with a d spacing 0.204 nm, corresponding to the (111) crystal planes of fcc Ni. Careful observations reveal that the angle between the end plane and the (111) crystal plane is 109.5°. For cubic lattice system, the angle between two crystal planes, such as planes  $(h_1k_1l_1)$  and  $(h_2k_2l_2)$ , follows the following formula:

$$\cos\theta = \frac{h_1h_2 + k_1k_2 + l_1l_2}{\sqrt{(h_1^2 + k_1^2 + l_1^2) + (h_2^2 + k_2^2 + l_2^2)}}$$

According to the formula, the angle between (111) and (-1-11) crystal planes is 109.5°. So it can be inferred that the end plane of the pod is (-1-11) crystal plane. The HRTEM supported that the growth directions of the pod is  $\langle 111 \rangle$  directions.

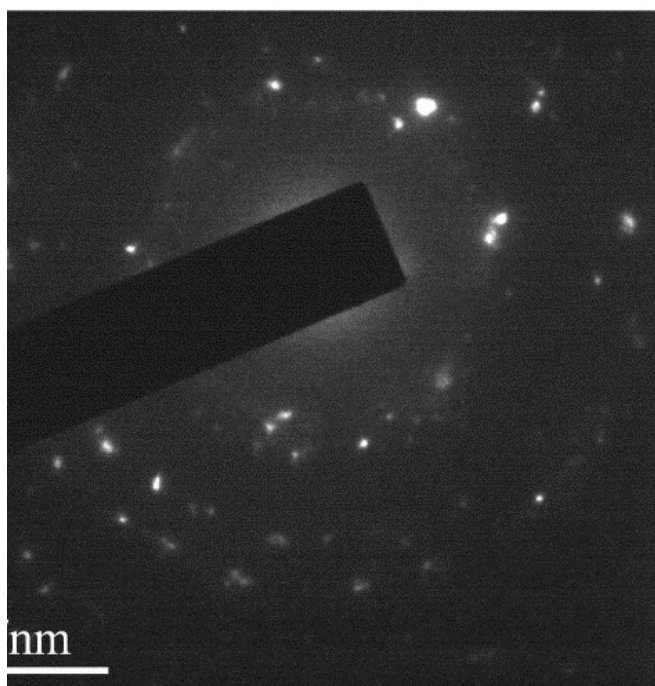

**Fig. S9** SAED image of Ni-SB.
